# Supplementary material
Source: PubMed Central journal article supplement (PMC7799371)
Supplement: NIHMS1655382-supplement-Supplementary_Tables__S1__S2__S3__S4__S5.pdf [file NIHMS1655382-supplement-Supplementary_Tables__S1__S2__S3__S4__S5.pdf]

| mLN fold difference gene expression to WT SPF |        |      |    |       |      |    |                   |  |  |      |      |    |                                 |  |  |                                            |                                 |  |      |      |    |                   |  |  |                                            |      |      |   |                |  |  |              |  |  |
|-----------------------------------------------|--------|------|----|-------|------|----|-------------------|--|--|------|------|----|---------------------------------|--|--|--------------------------------------------|---------------------------------|--|------|------|----|-------------------|--|--|--------------------------------------------|------|------|---|----------------|--|--|--------------|--|--|
| gene                                          | WT SPF |      |    | WT GF |      |    | WT ABX            |  |  |      |      |    | <i>Ifnb1</i> <sup>-/-</sup> SPF |  |  |                                            | <i>Ifnb1</i> <sup>-/-</sup> ABX |  |      |      |    |                   |  |  |                                            |      |      |   |                |  |  |              |  |  |
|                                               | Mean   | SEM  | N  | Mean  | SEM  | N  | p value to WT SPF |  |  | Mean | SEM  | N  | p value to WT SPF               |  |  | p value to <i>Ifnb1</i> <sup>-/-</sup> SPF |                                 |  | Mean | SEM  | N  | p value to WT SPF |  |  | p value to <i>Ifnb1</i> <sup>-/-</sup> ABX |      |      |   |                |  |  |              |  |  |
| <i>Mx1</i>                                    | 1.02   | 0.04 | 25 | 0.73  | 0.14 | 7  | 0.0311 (*)        |  |  | 0.68 | 0.07 | 13 | 0.0073 (**)                     |  |  | 0.7648 (ns)                                |                                 |  | 0.83 | 0.06 | 17 | 0.1552 (ns)       |  |  | 17                                         | 0.69 | 0.09 | 8 | 0.0419 (*)     |  |  | 0.8966 (ns)  |  |  |
| <i>Ifit1</i>                                  | 1.04   | 0.06 | 27 | 0.83  | 0.08 | 11 | 0.0527 (ns)       |  |  | 0.61 | 0.06 | 12 | 0.0002 (***)                    |  |  | 0.9997 (ns)                                |                                 |  | 0.63 | 0.05 | 21 | <0.0001 (****)    |  |  | 21                                         | 0.67 | 0.09 | 7 | 0.0138 (*)     |  |  | 0.9979 (ns)  |  |  |
| <i>Ifit2</i>                                  | 1.03   | 0.04 | 27 | 0.81  | 0.07 | 11 | 0.0311 (*)        |  |  | 0.75 | 0.11 | 12 | 0.0797 (ns)                     |  |  | 0.9791 (ns)                                |                                 |  | 0.68 | 0.04 | 21 | 0.0025 (**)       |  |  | 21                                         | 0.72 | 0.22 | 8 | 0.1184 (ns)    |  |  | 0.9978 (ns)  |  |  |
| <i>Ifit3</i>                                  | 1.04   | 0.06 | 27 | 0.68  | 0.07 | 11 | 0.0046 (**)       |  |  | 0.58 | 0.10 | 12 | <0.0001 (****)                  |  |  | 0.9986 (ns)                                |                                 |  | 0.56 | 0.04 | 21 | <0.0001 (****)    |  |  | 21                                         | 0.43 | 0.07 | 7 | <0.0001 (****) |  |  | 0.8118 (ns)  |  |  |
| <i>Oasl2</i>                                  | 1.01   | 0.03 | 26 | 0.73  | 0.06 | 11 | 0.0005 (****)     |  |  | 0.66 | 0.06 | 11 | <0.0001 (****)                  |  |  | >0.9999 (ns)                               |                                 |  | 0.66 | 0.03 | 21 | <0.0001 (****)    |  |  | 21                                         | 0.66 | 0.08 | 8 | <0.0001 (****) |  |  | >0.9999 (ns) |  |  |
| <i>Rsad2</i>                                  | 1.03   | 0.05 | 25 | 0.74  | 0.06 | 11 | 0.0047 (**)       |  |  | 0.63 | 0.06 | 10 | <0.0001 (****)                  |  |  | 0.8457 (ns)                                |                                 |  | 0.56 | 0.03 | 20 | <0.0001 (****)    |  |  | 20                                         | 0.56 | 0.05 | 7 | <0.0001 (****) |  |  | >0.9999 (ns) |  |  |
| <i>Irf7</i>                                   | 1.02   | 0.03 | 27 | 0.73  | 0.05 | 11 | 0.0005 (****)     |  |  | 0.77 | 0.06 | 12 | 0.0009 (***)                    |  |  | 0.8858 (ns)                                |                                 |  | 0.69 | 0.03 | 21 | <0.0001 (****)    |  |  | 21                                         | 0.75 | 0.05 | 8 | 0.0024 (**)    |  |  | 0.901 (ns)   |  |  |
| <i>Gbp4</i>                                   | 1.01   | 0.03 | 28 | 0.78  | 0.06 | 14 | 0.0009 (****)     |  |  | 0.81 | 0.07 | 12 | 0.0197 (*)                      |  |  | 0.3071 (ns)                                |                                 |  | 0.96 | 0.05 | 19 | 0.6544 (ns)       |  |  | 19                                         | 0.85 | 0.06 | 8 | 0.1917 (ns)    |  |  | 0.7471 (ns)  |  |  |

**Table S1. Statistical analysis of mLN ISG expression.** Related to Figure 1. mLNs were harvested from age- and gender-matched C57BL/6 WT GF mice and from WT or *Ifnb1*<sup>-/-</sup> SPF mice with and without broad spectrum antibiotics (ABX) treatment. RNA was isolated from whole tissue samples and qRT-PCR was performed to analyze ISG expression levels. Fold change gene expression was calculated compared to WT SPF mice using the  $\Delta\Delta CT$  method, with *ActB* as the reference gene. Statistical analysis with unpaired t-test (WT GF) or one-way ANOVA followed by Tukey's multiple comparisons test (WT ABX, *Ifnb1*<sup>-/-</sup> SPF, *Ifnb1*<sup>-/-</sup> ABX). N= number of samples analyzed, SEM=standard error of the mean, ns= not significant, \*p<0.05, \*\*p<0.01, \*\*\*p<0.001, \*\*\*\* p<0.0001.

| Spleen fold difference gene expression to WT SPF |        |      |    |       |      |    |                   |  |  |      |      |    |                                 |  |  |                                            |                                 |  |      |      |    |                   |  |  |                                            |      |      |    |                |  |  |              |  |  |
|--------------------------------------------------|--------|------|----|-------|------|----|-------------------|--|--|------|------|----|---------------------------------|--|--|--------------------------------------------|---------------------------------|--|------|------|----|-------------------|--|--|--------------------------------------------|------|------|----|----------------|--|--|--------------|--|--|
| gene                                             | WT SPF |      |    | WT GF |      |    | WT ABX            |  |  |      |      |    | <i>Ifnb1</i> <sup>-/-</sup> SPF |  |  |                                            | <i>Ifnb1</i> <sup>-/-</sup> ABX |  |      |      |    |                   |  |  |                                            |      |      |    |                |  |  |              |  |  |
|                                                  | Mean   | SEM  | N  | Mean  | SEM  | N  | p value to WT SPF |  |  | Mean | SEM  | N  | p value to WT SPF               |  |  | p value to <i>Ifnb1</i> <sup>-/-</sup> SPF |                                 |  | Mean | SEM  | N  | p value to WT SPF |  |  | p value to <i>Ifnb1</i> <sup>-/-</sup> ABX |      |      |    |                |  |  |              |  |  |
| <i>Mx1</i>                                       | 1.10   | 0.09 | 38 | 0.67  | 0.08 | 21 | 0.0208 (*)        |  |  | 0.83 | 0.07 | 15 | 0.2171 (ns)                     |  |  | 0.0658 (ns)                                |                                 |  | 0.47 | 0.04 | 25 | <0.0001 (****)    |  |  | 17                                         | 0.47 | 0.07 | 11 | 0.0002 (***)   |  |  | >0.9999 (ns) |  |  |
| <i>Ifit1</i>                                     | 1.07   | 0.07 | 29 | 1.00  | 0.17 | 8  | 0.9639 (ns)       |  |  | 0.61 | 0.05 | 20 | <0.0001 (****)                  |  |  | 0.871 (ns)                                 |                                 |  | 0.52 | 0.05 | 23 | <0.0001 (****)    |  |  | 21                                         | 0.37 | 0.06 | 11 | <0.0001 (****) |  |  | 0.7177 (ns)  |  |  |
| <i>Ifit2</i>                                     | 1.04   | 0.06 | 31 | 1.10  | 0.14 | 16 | 0.9639 (ns)       |  |  | 0.87 | 0.07 | 18 | 0.5135 (ns)                     |  |  | 0.2127 (ns)                                |                                 |  | 0.64 | 0.06 | 20 | 0.0012 (**)       |  |  | 21                                         | 0.56 | 0.13 | 8  | 0.0085 (**)    |  |  | 0.9879 (ns)  |  |  |
| <i>Ifit3</i>                                     | 1.02   | 0.04 | 41 | 0.81  | 0.05 | 24 | 0.0063 (**)       |  |  | 0.75 | 0.05 | 21 | 0.0001 (***)                    |  |  | 0.5977 (ns)                                |                                 |  | 0.58 | 0.04 | 27 | <0.0001 (****)    |  |  | 21                                         | 0.43 | 0.07 | 11 | <0.0001 (****) |  |  | 0.7042 (ns)  |  |  |
| <i>Oasl2</i>                                     | 1.03   | 0.04 | 38 | 0.93  | 0.07 | 21 | 0.6714 (ns)       |  |  | 0.59 | 0.07 | 21 | <0.0001 (****)                  |  |  | >0.9999 (ns)                               |                                 |  | 0.54 | 0.05 | 27 | <0.0001 (****)    |  |  | 21                                         | 0.43 | 0.05 | 11 | <0.0001 (****) |  |  | 0.5122 (ns)  |  |  |
| <i>Rsad2</i>                                     | 1.08   | 0.09 | 27 | 0.93  | 0.13 | 13 | 0.8667 (ns)       |  |  | 0.25 | 0.04 | 13 | <0.0001 (****)                  |  |  | 0.1149 (ns)                                |                                 |  | 0.63 | 0.11 | 20 | 0.0064 (**)       |  |  | 20                                         | 0.31 | 0.07 | 7  | 0.0007 (***)   |  |  | 0.4625 (ns)  |  |  |
| <i>Irf7</i>                                      | 1.03   | 0.04 | 38 | 1.06  | 0.08 | 21 | 0.9639 (ns)       |  |  | 0.69 | 0.03 | 21 | <0.0001 (****)                  |  |  | 0.83 (ns)                                  |                                 |  | 0.62 | 0.05 | 27 | <0.0001 (****)    |  |  | 21                                         | 0.46 | 0.05 | 11 | <0.0001 (****) |  |  | 0.3749 (ns)  |  |  |
| <i>Gbp4</i>                                      | 1.02   | 0.04 | 27 | 0.65  | 0.05 | 15 | <0.0001 (****)    |  |  | 0.89 | 0.04 | 21 | 0.2753 (ns)                     |  |  | 0.9962 (ns)                                |                                 |  | 0.92 | 0.07 | 16 | 0.5894 (ns)       |  |  | 19                                         | 0.85 | 0.07 | 11 | 0.2112 (ns)    |  |  | 0.9356 (ns)  |  |  |

**Table S2. Statistical analysis of spleen ISG expression.** Related to Figure 1. Spleens were harvested from age- and gender-matched C57BL/6 WT GF mice and from WT or *Ifnb1*<sup>-/-</sup> SPF mice with and without broad spectrum antibiotics (ABX) treatment. RNA was isolated from whole tissue samples and qRT-PCR was performed to analyze ISG expression levels. Fold change gene expression was calculated compared to WT SPF mice using the  $\Delta\Delta CT$  method, with *ActB* as the reference gene. Statistical analysis with unpaired t-test (WT GF) or one-way ANOVA followed by Tukey's multiple comparisons test (WT ABX, *Ifnb1*<sup>-/-</sup> SPF, *Ifnb1*<sup>-/-</sup> ABX). N= number of samples analyzed, SEM=standard error of the mean, ns= not significant, \*p<0.05, \*\*p<0.01, \*\*\*p<0.001, \*\*\*\* p<0.0001.

| mLN fold difference gene expression to WT SPF |        |      |    |            |      |    |                   |                                |      |   |                   |  |
|-----------------------------------------------|--------|------|----|------------|------|----|-------------------|--------------------------------|------|---|-------------------|--|
| gene                                          | WT SPF |      |    | WT SPF+Met |      |    |                   | <i>Tlr4</i> <sup>-/-</sup> SPF |      |   |                   |  |
|                                               | Mean   | SEM  | N  | Mean       | SEM  | N  | p value to WT SPF | Mean                           | SEM  | N | p value to WT SPF |  |
| <i>Mx1</i>                                    | 1.03   | 0.08 | 12 | 0.74       | 0.08 | 10 | 0.0168 (*)        | 0.57                           | 0.14 | 6 | 0.0079 (**)       |  |
| <i>Ifit1</i>                                  | 1.04   | 0.09 | 12 | 0.72       | 0.10 | 8  | 0.0354 (*)        | 0.65                           | 0.13 | 6 | 0.0218 (*)        |  |
| <i>Ifit2</i>                                  | 1.03   | 0.08 | 12 | 0.68       | 0.09 | 8  | 0.0113 (*)        | 0.62                           | 0.12 | 6 | 0.0113 (*)        |  |
| <i>Ifit3</i>                                  | 1.04   | 0.09 | 12 | 0.67       | 0.11 | 8  | 0.0201 (*)        | 0.76                           | 0.24 | 6 | 0.2109 (ns)       |  |
| <i>Oasl2</i>                                  | 1.01   | 0.03 | 12 | 0.83       | 0.05 | 8  | 0.0082 (**)       | 0.76                           | 0.10 | 6 | 0.0107 (*)        |  |
| <i>Rsad2</i>                                  | 1.02   | 0.06 | 12 | 0.75       | 0.05 | 7  | 0.0286 (*)        | 0.72                           | 0.14 | 6 | 0.0363 (*)        |  |
| <i>Irf7</i>                                   | 1.02   | 0.05 | 12 | 0.85       | 0.07 | 10 | 0.0805 (ns)       | 0.86                           | 0.08 | 6 | 0.1074 (ns)       |  |

**Table S3. Statistical analysis of mLN ISG expression.** Related to Figure 4. mLN s were harvested from age- and gender-matched WT SPF mice with and without metronidazole (Met) treatment and *Tlr4*<sup>-/-</sup> SPF mice. RNA was isolated from whole tissue samples and qRT-PCR was performed to analyze ISG expression levels. Fold change gene expression was calculated compared to WT SPF mice using the  $\Delta\Delta CT$  method, with *ActB* as the reference gene. N= number of samples analyzed, SEM=standard error of the mean, ns= not significant, \*p<0.05, \*\*p<0.01.

| Spleen fold difference gene expression to WT SPF |        |      |    |            |      |    |                   |                                |      |    |                   |  |
|--------------------------------------------------|--------|------|----|------------|------|----|-------------------|--------------------------------|------|----|-------------------|--|
| gene                                             | WT SPF |      |    | WT SPF+Met |      |    |                   | <i>Tlr4</i> <sup>-/-</sup> SPF |      |    |                   |  |
|                                                  | Mean   | SEM  | N  | Mean       | SEM  | N  | p value to WT SPF | Mean                           | SEM  | N  | p value to WT SPF |  |
| <i>Mx1</i>                                       | 1.17   | 0.19 | 18 | 0.78       | 0.08 | 12 | 0.1179 (ns)       | 0.74                           | 0.14 | 8  | 0.1676 (ns)       |  |
| <i>Ifit1</i>                                     | 1.09   | 0.13 | 15 | 0.57       | 0.13 | 8  | 0.0175 (*)        | 0.63                           | 0.16 | 11 | 0.03 (*)          |  |
| <i>Ifit2</i>                                     | 1.04   | 0.08 | 18 | 0.69       | 0.07 | 12 | 0.0033 (**)       | 0.54                           | 0.11 | 8  | 0.0011 (**)       |  |
| <i>Ifit3</i>                                     | 1.06   | 0.09 | 18 | 0.76       | 0.06 | 12 | 0.0273 (*)        | 1.01                           | 0.14 | 8  | 0.7998 (ns)       |  |
| <i>Oasl2</i>                                     | 1.02   | 0.05 | 18 | 0.74       | 0.07 | 12 | 0.002 (**)        | 0.93                           | 0.06 | 8  | 0.2953 (ns)       |  |
| <i>Rsad2</i>                                     | 1.11   | 0.12 | 16 | 0.46       | 0.09 | 12 | 0.0005 (***)      | 0.35                           | 0.05 | 7  | 0.0007 (***)      |  |
| <i>Irf7</i>                                      | 1.02   | 0.06 | 13 | 0.68       | 0.07 | 12 | 0.0011 (**)       | 0.72                           | 0.13 | 4  | 0.0322 (*)        |  |

**Table S4. Statistical analysis of spleen ISG expression.** Related to Figure 4. Spleens were harvested from age- and gender-matched WT SPF mice with and without metronidazole (Met) treatment and *Tlr4*<sup>-/-</sup> SPF mice. RNA was isolated from whole tissue samples and qRT-PCR was performed to analyze ISG expression levels. Fold change gene expression was calculated compared to WT SPF mice using the  $\Delta\Delta CT$  method, with *ActB* as the reference gene. N= number of samples analyzed, SEM=standard error of the mean, ns= not significant, \*p<0.05, \*\*p<0.01, \*\*\*p<0.001.

| <b>Gene</b>  | <b>Forward Primer</b>       | <b>Reverse Primer</b>         | <b>Source</b>             |
|--------------|-----------------------------|-------------------------------|---------------------------|
| <i>Ifit1</i> | 5'-CAGAAGCACACATTGAAGAA-3'  | 5'-TGTAAGTAGCCAGAGGAAGG-3'    | Fensterl et al., 2008     |
| <i>Ifit2</i> | 5'-GGGAAAGCAGAGGAAATCAA-3'  | 5'-TGAAAGTTGCCATACAGAAG-3'    | Fensterl et al., 2008     |
| <i>Ifit3</i> | 5'-GCCGTTACAGGGAAATACTGG-3' | 5'-CCTCAACATCGGGGCTCT-3'      | Fensterl et al., 2008     |
| <i>Oasl2</i> | 5'-GGATGCCTGGGAGAGAATCG-3'  | 5'-TCGCCTGCTCTTCGAAACTG-3'    | Sommereynset et al., 2008 |
| <i>Rsad2</i> | 5'-AACAGGCTGGTTTGGAGAAG-3'  | 5'-TGCCATTGCTCACTATGCTC-3'    | this paper                |
| <i>Irf7</i>  | 5'-GCCAGGAGCAAGACCGTGTT-3'  | 5'-TGCCCCACCACTGCCTGTA-3'     | Bordignon et al., 2008    |
| <i>Gbp4</i>  | 5'-TGGGGACACAGGCTCTACA-3'   | 5'-GCCTGCAGGATGGA ACTCTCAA-3' | Bordignon et al., 2008    |
| <i>ifnb1</i> | 5'-CCTACAGGGCGGACTTCAAG-3'  | 5'-GGATGGCAAAGGCAGTGTA ACT-3' | Chirido et al., 2005      |
| <i>Bst2</i>  | 5'-GAAGTCACGAAGCTGAACCA-3'  | 5'-CCTGCACTGTGCTAGAAGTCTC-3'  | Holmgren et al., 2015     |
| <i>Actb</i>  | 5'-GATGCTCCCCGGGCTGTATT-3'  | 5'-GGGGTACTTCAGGGTCAGGA-3'    | Diegelmann et al., 2012   |

**Table S5. qRT-PCR primer sequences.** Related to STAR methods.
